# Supplementary material for: Effects of intra-abdominal sepsis on atherosclerosis in mice
Source: Springer Nature journal article supplement (doi:10.1186/s13054-014-0469-1), 2014-09-02

Additional File 1

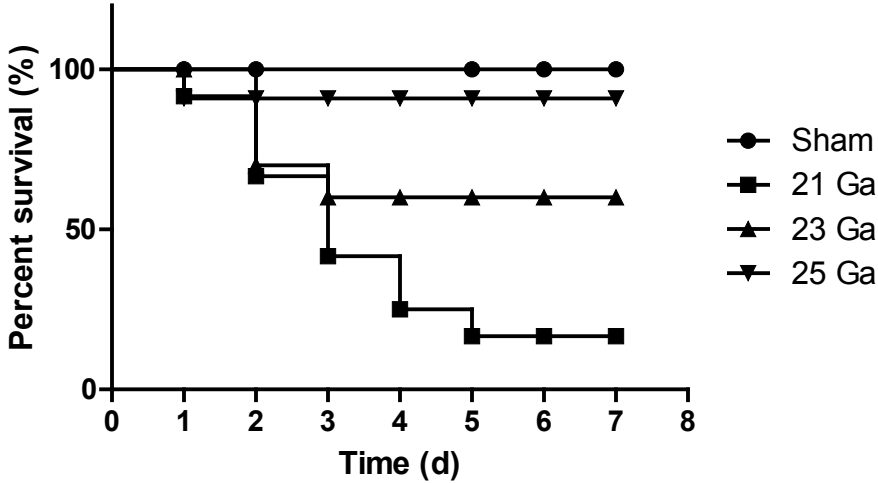

Supplement: MOESM9 [file 9779546]
